# Supplementary material for: The construction of a CND/Cu2+ fluorescence sensing system for the ultrasensitive detection of glyphosate
Source: Royal Society of Chemistry journal article supplement (doi:10.1039/c9ay02303h), 2019-12-20
Supplement: c9ay02303h1.pdf [file c9ay02303h1.pdf]

### Supporting information

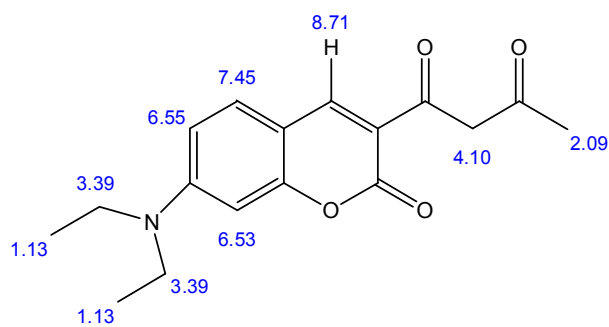

**Figure S1** Chemical NMR H-1 estimation of CND.

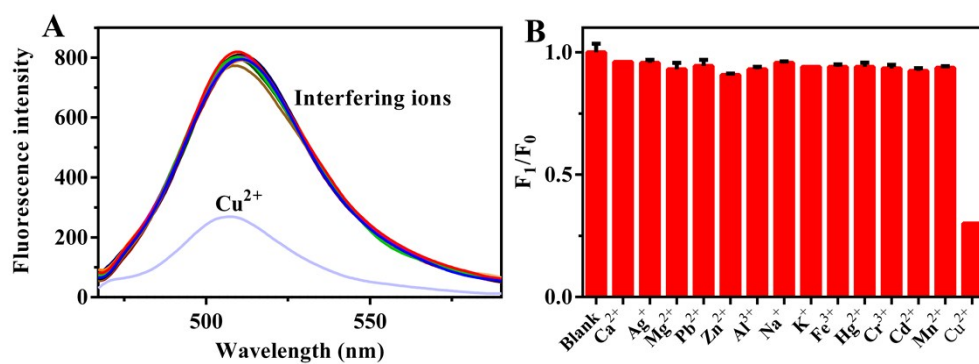

**Figure S2** Fluorescence emission spectra of CND in the presence of different metal ions with the concentration of 10.00  $\mu\text{M}$  ( $\text{Ag}^+$ ,  $\text{Mg}^{2+}$ ,  $\text{Pb}^{2+}$ ,  $\text{Zn}^{2+}$ ,  $\text{Al}^{3+}$ ,  $\text{Na}^+$ ,  $\text{K}^+$ ,  $\text{Fe}^{3+}$ ,  $\text{Hg}^{2+}$ ,  $\text{Cr}^{3+}$ ,  $\text{Cd}^{2+}$ ,  $\text{Mn}^{2+}$  and  $\text{Cu}^{2+}$ ).

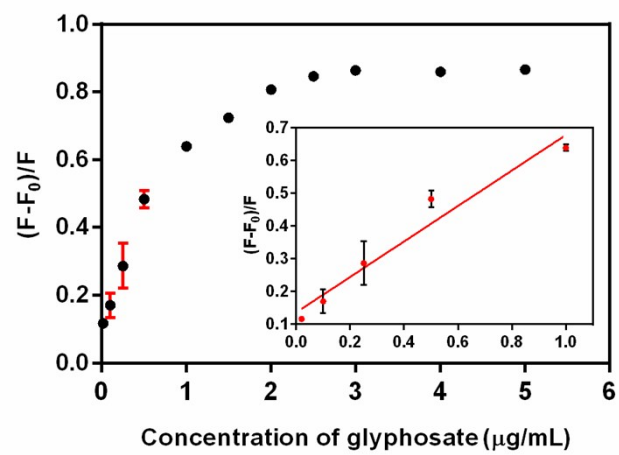

**Figure S3** Fluorescence response curve of CND/Cu<sup>2+</sup> sensor for glyphosate detection using Stern–Volmer equation.

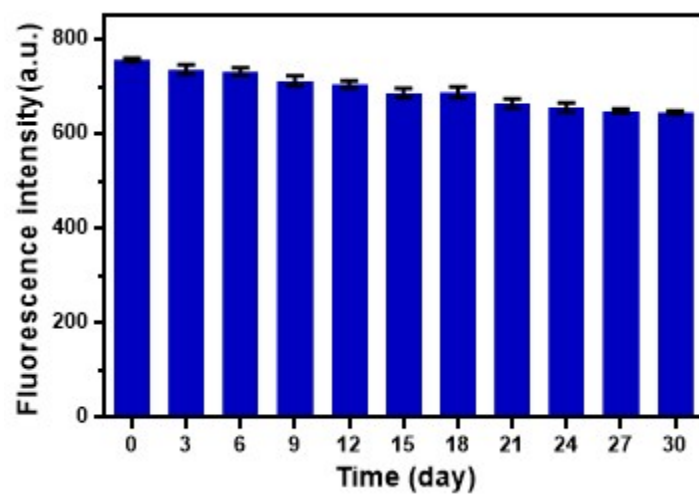

**Figure S4** Stability of the as-prepared sensor upon time.
